# Supplementary material for: Anti-interleukin-1 treatment in patients with rheumatoid arthritis and type 2 diabetes (TRACK): A multicentre, open-label, randomised controlled trial
Source: PubMed Central journal article supplement (PMC6742232; doi:10.1371/journal.pmed.1002901), 2019-09-12
Supplement: pmed.1002901.s002.pdf [file pmed.1002901.s002.pdf]

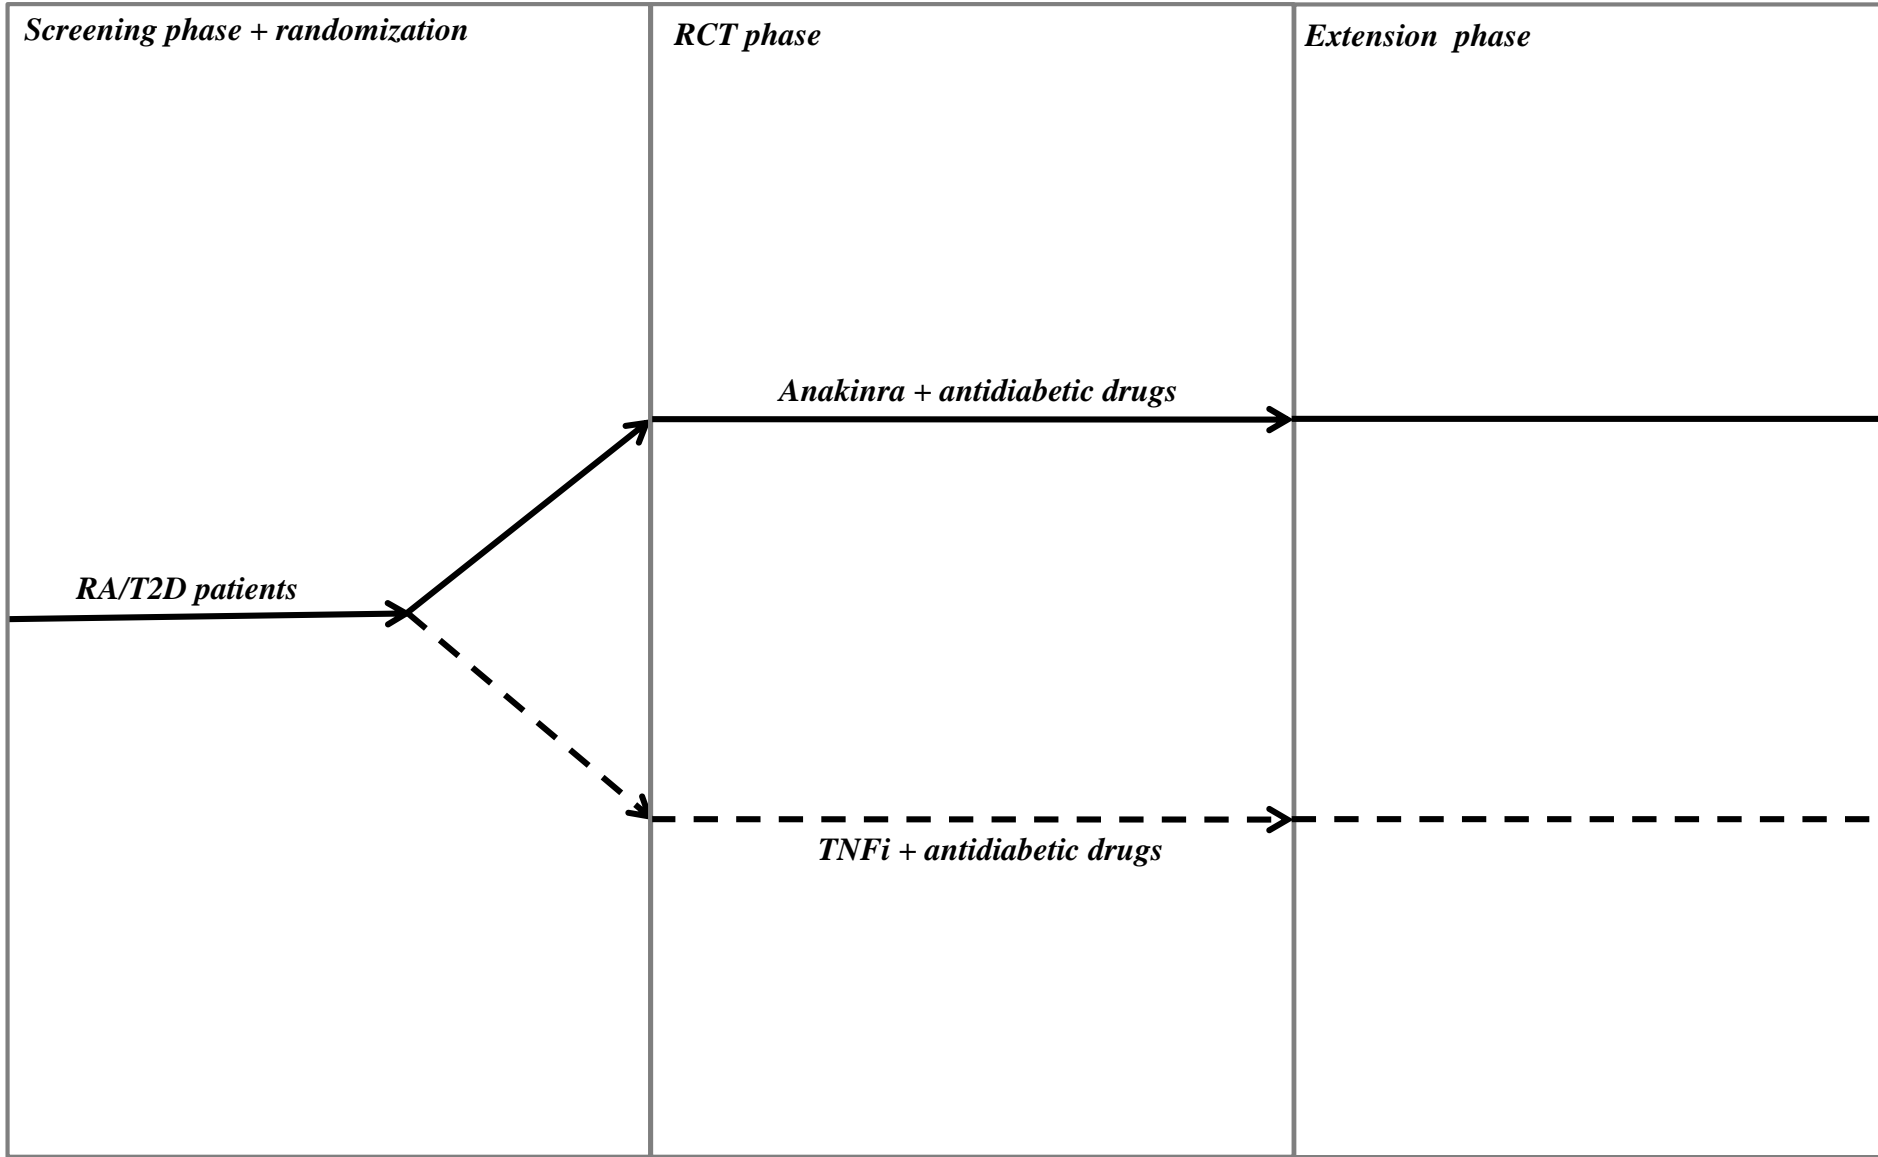

*Screening phase + randomization*

*T0*

*T3*

*T6*

*T12*

*-12*

*0*

*3*

*6*

*12*

*Time of Follow-Up -Months*
